# Supplementary material for: Complete Chloroplast Genome Sequence of Erigeron breviscapus and Characterization of Chloroplast Regulatory Elements
Source: Front Plant Sci. 2021 Nov 25;12:758290. doi: 10.3389/fpls.2021.758290 (PMC8657942; doi:10.3389/fpls.2021.758290)
Supplement: Supplementary file 2 [file Table_2.xlsx]

## Sheet: summary.txt
Supplementary Table 2. Statistics on the data volume of the third-generation sequencing of the chloroplast genome of E. breviscapus.
Rank	Flag	TotalBase	TotalReads	MaxLen	AvgLen	N50	L50	N90	L90	meanQ
>0	all	2368774396	211005	349955	11226.1	24438	29467	4718	113799	8.95
>0	pass	2178573881	193438	156031	11262.4	24411	27220	4729	104705	9.18
>0	fail	190200515	17567	349955	10827.1	24848	2248	4602	9097	6.36
>1000	all	2359441604	194362	349955	12139.4	24545	29277	4838	112041	8.94
>1000	pass	2170330428	178765	156031	12140.7	24510	27051	4841	103155	9.17
>1000	fail	189111176	15597	349955	12124.8	25005	2226	4770	8887	6.36
>2000	all	2331955722	176614	349955	13203.7	24880	28721	5203	107106	8.93
>2000	pass	2145241461	162591	156031	13194.1	24845	26543	5204	98653	9.15
>2000	fail	186714261	14023	349955	13314.9	25355	2179	5175	8454	6.36
>5000	all	2111892202	109680	349955	19255	27644	24525	8641	77563	8.83
>5000	pass	1942912762	101043	156031	19228.6	27576	22676	8640	71498	9.04
>5000	fail	168979440	8637	349955	19564.6	28465	1850	8655	6065	6.36
>10000	all	1831687848	70144	349955	26113.2	31325	19761	13750	54578	8.77
>10000	pass	1685222092	64683	156031	26053.5	31212	18283	13744	50365	8.98
>10000	fail	146465756	5461	349955	26820.3	32420	1480	13813	4214	6.37
>20000	all	1369221160	37812	349955	36211.3	38020	13060	23302	31474	8.72
>20000	pass	1258978502	34886	156031	36088.3	37912	12089	23278	29056	8.92
>20000	fail	110242658	2926	349955	37676.9	39708	973	23595	2419	6.37
>22000	all	1286548872	33870	349955	37984.9	39374	11991	25051	28397	8.72
>22000	pass	1182692378	31248	156031	37848.6	39221	11100	25032	26214	8.91
>22000	fail	103856494	2622	349955	39609.6	41059	894	25337	2183	6.37
>24000	all	1203433511	30253	349955	39779	40783	10954	26952	25519	8.71
>24000	pass	1105815918	27902	156031	39632.1	40613	10137	26924	23549	8.91
>24000	fail	97617593	2351	349955	41521.7	42545	820	27366	1971	6.37
>25000	all	1160637185	28506	349955	40715.5	41569	10434	27932	24115	8.71
>25000	pass	1066080317	26280	156031	40566.2	41440	9653	27895	22244	8.91
>25000	fail	94556868	2226	349955	42478.4	43195	784	28276	1872	6.37
>26000	all	1121137707	26956	349955	41591.4	42273	9963	28823	22863	8.71
>26000	pass	1029176672	24832	156031	41445.6	42128	9211	28797	21073	8.91
>26000	fail	91961035	2124	349955	43296.2	43806	754	29079	1790	6.38
>28000	all	1042061890	24025	349955	43374.1	43763	9044	30692	20471	8.7
>28000	pass	956150424	22125	156031	43215.8	43642	8359	30676	18863	8.9
>28000	fail	85911466	1900	349955	45216.6	45301	686	30980	1609	6.38
>30000	all	964636349	21353	349955	45175.7	45275	8174	32599	18269	8.7
>30000	pass	884521555	19653	156031	45006.9	45160	7552	32584	16825	8.9
>30000	fail	80114794	1700	349955	47126.3	46695	623	32775	1445	6.38
>40000	all	625488943	11542	349955	54192.4	53190	4711	42187	10019	8.68
>40000	pass	570951363	10584	156031	53944.8	52989	4341	42166	9194	8.88
>40000	fail	54537580	958	349955	56928.6	55766	372	42489	826	6.41
>50000	all	375751206	5932	349955	63343.1	61764	2527	51909	5195	8.64
>50000	pass	340493933	5409	156031	62949.5	61467	2317	51831	4741	8.85
>50000	fail	35257273	523	349955	67413.5	66789	212	52485	455	6.44
>100000	all	13517028	115	349955	117539	111896	51	101467	102	7.99
>100000	pass	10324391	89	156031	116004	114441	40	101467	79	8.47
>100000	fail	3192637	26	349955	122794	108231	11	101869	23	6.34
